# Supplementary material for: Clinical instructors’ perceptions of virtual reality in health professionals’ cardiopulmonary resuscitation education
Source: PubMed Central journal article supplement — SAGE Open Med. 2018 Sep 17;6:2050312118799602. doi: 10.1177/2050312118799602 (PMC6144504; doi:10.1177/2050312118799602), 2018-09-17
Supplement: Raw_Data_(2).pdf [file Raw_Data_%282%29.pdf]

## Raw Data

### Questionnaire A

#### 1. Candidates pass their CPR test easily on their first try (please circle).

|                   |                                                          |
|-------------------|----------------------------------------------------------|
| Strongly Agree    | 25                                                       |
| Agree             | 5, 13, 16, 19, 26, 29                                    |
| Neutral           | 1, 3, 14, 20, 21, 24                                     |
| Disagree          | 2, 4, 6, 7, 8, 9, 10, 11, 12, 15, 17, 18, 22, 23, 27, 30 |
| Strongly Disagree | 28                                                       |

#### 2. What are some common mistakes made by CPR test candidates?

|   |                                                                                                                                                                                                                                          |
|---|------------------------------------------------------------------------------------------------------------------------------------------------------------------------------------------------------------------------------------------|
| 1 | <ul style="list-style-type: none"><li>• Compression too hard/too shallow.</li><li>• Breathing – not enough volume, delay in timing when switching.</li><li>• Wrong/unsure steps especially at the beginning during assessment.</li></ul> |
| 2 | <ul style="list-style-type: none"><li>• The steps.</li><li>• Wrong landmark.</li><li>• Depth &lt;5cm.</li><li>• Not enough ventilation.</li></ul>                                                                                        |
| 3 | <ul style="list-style-type: none"><li>• Compression depth insufficient.</li><li>• Ventilation insufficient.</li><li>• Confused between FVAO and one-man CPR.</li></ul>                                                                   |
| 4 | <ul style="list-style-type: none"><li>• Theory.</li><li>• Lack of application.</li><li>• Wrong landmark.</li></ul>                                                                                                                       |
| 5 | <ul style="list-style-type: none"><li>• Inability to do the compression to achieve target of 4-6mm (in adults).</li><li>• Inability to perform ventilation &gt;400mls in adults.</li></ul>                                               |
| 6 | <ul style="list-style-type: none"><li>• Wrong hand position.</li><li>• No relaxation for recoil of the chest.</li></ul>                                                                                                                  |

|    |                                                                                                                                                                                                        |
|----|--------------------------------------------------------------------------------------------------------------------------------------------------------------------------------------------------------|
|    | <ul style="list-style-type: none"> <li>• Not enough strength for compression.</li> </ul>                                                                                                               |
| 7  | <ul style="list-style-type: none"> <li>• Chest compression not depth enough.</li> <li>• Sequences of event/CPR is not in order.</li> </ul>                                                             |
| 8  | <ul style="list-style-type: none"> <li>• Steps missed out or not familiar.</li> </ul>                                                                                                                  |
| 9  | <ul style="list-style-type: none"> <li>• Unfamiliar with steps.</li> <li>• Wrong landmarks.</li> <li>• Over/under ventilate.</li> </ul>                                                                |
| 10 | <ul style="list-style-type: none"> <li>• Unsure of landmarks.</li> <li>• No. of ventilations.</li> <li>• Inadequate compression.</li> </ul>                                                            |
| 11 | <ul style="list-style-type: none"> <li>• Unable to give good ventilations.</li> <li>• Not familiar with steps.</li> <li>• No proper compressions.</li> </ul>                                           |
| 12 | <ul style="list-style-type: none"> <li>• Adequate relaxation for compression.</li> <li>• Wrong landmarks.</li> <li>• Insufficient depths.</li> </ul>                                                   |
| 13 | <ul style="list-style-type: none"> <li>• Never read before attend.</li> <li>• Not sure of steps.</li> <li>• Tracing of landmarks.</li> </ul>                                                           |
| 14 | <ul style="list-style-type: none"> <li>• Unable to perform ventilation and compression.</li> <li>• Wrong hand position.</li> <li>• Not enough depth for compression and ventilation volume.</li> </ul> |
| 15 | <ul style="list-style-type: none"> <li>• Remembering the steps and sequence.</li> <li>• The volume.</li> <li>• Depths.</li> </ul>                                                                      |
| 16 | <ul style="list-style-type: none"> <li>• Position.</li> <li>• Depth of compression.</li> <li>• Breathing.</li> <li>• Interval.</li> </ul>                                                              |
| 17 | <ul style="list-style-type: none"> <li>• Sequence issue.</li> </ul>                                                                                                                                    |

|    |                                                                                                                                                                                                                                        |
|----|----------------------------------------------------------------------------------------------------------------------------------------------------------------------------------------------------------------------------------------|
|    | <ul style="list-style-type: none"> <li>• Compression (no relaxation, depth issue).</li> <li>• Breathing – less than required.</li> </ul>                                                                                               |
| 18 | <ul style="list-style-type: none"> <li>• Wrong landmark.</li> <li>• Wrong sequence.</li> <li>• Not able to give good ventilation/compression.</li> </ul>                                                                               |
| 19 | <ul style="list-style-type: none"> <li>• Not updated on the guidelines.</li> </ul>                                                                                                                                                     |
| 20 | <ul style="list-style-type: none"> <li>• No recoil.</li> <li>• Too shallow/too deep.</li> <li>• Unable to deliver ventilation.</li> <li>• Some unable to recall steps but focus of assessment.</li> </ul>                              |
| 21 | <ul style="list-style-type: none"> <li>• Landmark position.</li> <li>• Did not lock the arms during compressions.</li> <li>• Physical limitation to use more of body weight during compressions.</li> </ul>                            |
| 22 | <ul style="list-style-type: none"> <li>• Compression depth not enough or too much.</li> <li>• Breath not enough.</li> </ul>                                                                                                            |
| 23 | <ul style="list-style-type: none"> <li>• Locate landmark.</li> <li>• Sequence and steps.</li> <li>• Technique.</li> </ul>                                                                                                              |
| 24 | <ul style="list-style-type: none"> <li>• Poor technique for ventilation.</li> <li>• Not enough ventilation volume/compression depth.</li> <li>• Most forget to danger before assessing “patient” – but not important.</li> </ul>       |
| 25 | <ul style="list-style-type: none"> <li>• Techniques like pumping, breathing.</li> <li>• Major steps in CPR generally ok.</li> <li>• More complicated, e.g. AED, ACLS may be difficult to remember if not perform regularly.</li> </ul> |
| 26 | <ul style="list-style-type: none"> <li>• Stopping CPR while other staff are preparing equipment (distracted by other staff preparing equipment).</li> </ul>                                                                            |
| 27 | <ul style="list-style-type: none"> <li>• Depth of compressions, timing, location.</li> <li>• Ventilation usually one out of the correct range.</li> </ul>                                                                              |
| 28 | <ul style="list-style-type: none"> <li>• Never read manual.</li> </ul>                                                                                                                                                                 |
| 29 | <ul style="list-style-type: none"> <li>• Incorrect chest compression.</li> </ul>                                                                                                                                                       |
| 30 | <ul style="list-style-type: none"> <li>• Wrong landmark for CPR.</li> </ul>                                                                                                                                                            |

|  |                                                                                                                                                                             |
|--|-----------------------------------------------------------------------------------------------------------------------------------------------------------------------------|
|  | <ul style="list-style-type: none"> <li>• Not familiar with sequence of ABC resuscitation.</li> <li>• Wrong technique of CPR.</li> <li>• Wrong breathing pattern.</li> </ul> |
|--|-----------------------------------------------------------------------------------------------------------------------------------------------------------------------------|

### 3. Why do you think such mistakes are made?

|   |                                                                                                                                                                                                                                                                                       |
|---|---------------------------------------------------------------------------------------------------------------------------------------------------------------------------------------------------------------------------------------------------------------------------------------|
| 1 | <ul style="list-style-type: none"> <li>• No proper structure refreshing course/revision.</li> <li>• No experience and no practice in daily life.</li> </ul>                                                                                                                           |
| 2 | <ul style="list-style-type: none"> <li>• Did not study lack of knowledge.</li> <li>• Manikin types are different.</li> <li>• Poor technique, not enough strength, body weight.</li> </ul>                                                                                             |
| 3 | <ul style="list-style-type: none"> <li>• Not aware of the rationale behind each steps.</li> <li>• Come from department that seldom have resuscitation.</li> <li>• Did not read up before coming.</li> <li>• Informed by their supervisor too late, thus no time to study.</li> </ul>  |
| 4 | <ul style="list-style-type: none"> <li>• Participants did not watch the e-learning or read the notes.</li> <li>• Materials not sufficient.</li> </ul>                                                                                                                                 |
| 5 | <ul style="list-style-type: none"> <li>• Improper technique (depends on the participant background, e.g. AW may not have enough exposure).</li> <li>• Reading material provided online. Participants may not have time to read.</li> </ul>                                            |
| 6 | <ul style="list-style-type: none"> <li>• Wrong hand position – hands sweaty and slide.</li> <li>• No relaxation – improper technique.</li> <li>• Not enough strength – small hands or small size staff.</li> <li>• No time to review materials. Expected further teaching.</li> </ul> |
| 7 | <ul style="list-style-type: none"> <li>• Not well-prepared.</li> <li>• The teaching material not very effective. Based on different learning style/approach.</li> <li>• Not updated teaching material such as to use old manual to conduct the training.</li> </ul>                   |
| 8 | <ul style="list-style-type: none"> <li>• Not familiar.</li> <li>• Not enough practice, every two years can be quite long and only depends on e-learning.</li> </ul>                                                                                                                   |
| 9 | <ul style="list-style-type: none"> <li>• Lack of training.</li> <li>• Lack of hands on practice.</li> </ul>                                                                                                                                                                           |

|    |                                                                                                                                                                                                                                                                    |
|----|--------------------------------------------------------------------------------------------------------------------------------------------------------------------------------------------------------------------------------------------------------------------|
| 10 | <ul style="list-style-type: none"> <li>• It is obvious that more of the participants do not study. Perhaps no time or complacency.</li> </ul>                                                                                                                      |
| 11 | <ul style="list-style-type: none"> <li>• Never study.</li> <li>• Not prepared.</li> <li>• Materials might not be clear – on paper only (manual).</li> </ul>                                                                                                        |
| 12 | <ul style="list-style-type: none"> <li>• Unaware that did not release compression totally from the chest before initiate the next compression.</li> <li>• The hands hand shifted during compression.</li> <li>• Not enough strength to do compression.</li> </ul>  |
| 13 | <ul style="list-style-type: none"> <li>• No reading. No practice.</li> </ul>                                                                                                                                                                                       |
| 14 | <ul style="list-style-type: none"> <li>• Wrong technique.</li> </ul>                                                                                                                                                                                               |
| 15 | <ul style="list-style-type: none"> <li>• Not a daily “bread and butter” skills unless one works in a acute setting e.g. ICU/ED.</li> </ul>                                                                                                                         |
| 16 | <ul style="list-style-type: none"> <li>• Lack of practice.</li> <li>• No opportunity to do “breathing” at work.</li> <li>• Lack of opportunity.</li> </ul>                                                                                                         |
| 17 | <ul style="list-style-type: none"> <li>• May not have frequent resuscitation done in clinical areas.</li> <li>• Did not read the material/view video prior to test.</li> <li>• Some “very thin” staff has no “strength” to do compression continuously.</li> </ul> |
| 18 | <ul style="list-style-type: none"> <li>• No strength.</li> <li>• No pre-reading (time/no motivation).</li> </ul>                                                                                                                                                   |
| 19 | <ul style="list-style-type: none"> <li>• Techniques (CPR) for first-timers.</li> <li>• Lack of CPR experience in real-life situation so job-scope + age.</li> </ul>                                                                                                |
| 20 | <ul style="list-style-type: none"> <li>• Lack of strength.</li> <li>• Not enough practice time prior test.</li> <li>• Practiced too much run out of strength.</li> <li>• 2 years recert is suitable timing due to time and resource constraint.</li> </ul>         |
| 21 | <ul style="list-style-type: none"> <li>• Anxiety.</li> <li>• Too “rush” during emergency.</li> </ul>                                                                                                                                                               |
| 22 | <ul style="list-style-type: none"> <li>• Different manikin may result in inability to capture accurately on the performing of CPR.</li> <li>• Nervous.</li> <li>• Unable to translate theory knowledge into practical scenario.</li> </ul>                         |
| 23 | <ul style="list-style-type: none"> <li>• Not practice frequently due to job scope.</li> </ul>                                                                                                                                                                      |

|    |                                                                                                                                                                                        |
|----|----------------------------------------------------------------------------------------------------------------------------------------------------------------------------------------|
| 24 | <ul style="list-style-type: none"> <li>• Not familiar with mannequin – different ones used from previous assessment, insufficient practice.</li> <li>• New staff – nervous?</li> </ul> |
| 25 | <ul style="list-style-type: none"> <li>• Lack of practice (or encounters).</li> <li>• Materials (education) ok but easily to forget if don't practice.</li> </ul>                      |
| 26 | <ul style="list-style-type: none"> <li>• Distracted by other staff.</li> <li>• More focused on intubation and drugs and defibrillation instead of performing CPR.</li> </ul>           |
| 27 | <ul style="list-style-type: none"> <li>• Practice simulation tends to be not as realistic.</li> </ul>                                                                                  |
| 28 | <ul style="list-style-type: none"> <li>• They assume test easy to pass.</li> </ul>                                                                                                     |
| 29 | <ul style="list-style-type: none"> <li>• Inadequate practice opportunity.</li> </ul>                                                                                                   |
| 30 | <ul style="list-style-type: none"> <li>• Lack of supervised practice.</li> </ul>                                                                                                       |

**4. Virtual Reality (VR) is a technology which uses computers to generate 3-D portrayal of places in the real or imaginary world. Scenarios can be implanted for student training, e.g. cardiac arrest situation used to teach CPR.**

**a) Do you have any experience with VR technology? If yes, please provide details.**

|     |                                                                                                            |
|-----|------------------------------------------------------------------------------------------------------------|
| Yes | 9 (DM), 13 (neurosurgery pre-op planning for registrars), 26 (games, movies, Samsung Oculus), 29 (gaming). |
| No  | 1, 2, 3, 4, 5, 6, 7, 8, 10, 11, 12, 14, 15, 16, 17, 18, 19, 20, 21, 22, 23, 24, 25, 27, 28, 30.            |

**b) What is your view on using VR as part of CPR education?**

|   |                                                                                                                                                                                                     |
|---|-----------------------------------------------------------------------------------------------------------------------------------------------------------------------------------------------------|
| 1 | <ul style="list-style-type: none"> <li>• Can try. Might have difficulty for older generation. Would be good if could hand on and feel the manikin to recognize the depth of compression.</li> </ul> |
| 2 | <ul style="list-style-type: none"> <li>• Maybe more real for the participant.</li> </ul>                                                                                                            |
| 3 | <ul style="list-style-type: none"> <li>• New and fresh idea worth a try. It may work better than video (only resource prior to coming).</li> </ul>                                                  |
| 4 | <ul style="list-style-type: none"> <li>• It will be creative and innovative.</li> <li>• Can use as pre-course preparation.</li> <li>• Prepare their expectations.</li> </ul>                        |
| 5 | <ul style="list-style-type: none"> <li>• It is something new. I hope VR will allow and provide hands-on since CPR is very technical.</li> </ul>                                                     |
| 6 | <ul style="list-style-type: none"> <li>• It can be fun and interesting to study.</li> </ul>                                                                                                         |

|    |                                                                                                                                                                                                        |
|----|--------------------------------------------------------------------------------------------------------------------------------------------------------------------------------------------------------|
| 7  | <ul style="list-style-type: none"> <li>• Good try by using the VR tech in medical teaching.</li> </ul>                                                                                                 |
| 8  | <ul style="list-style-type: none"> <li>• Could be something new and interesting for current generation.</li> <li>• New way of learning.</li> </ul>                                                     |
| 9  | <ul style="list-style-type: none"> <li>• It is very useful for the participants.</li> </ul>                                                                                                            |
| 10 | <ul style="list-style-type: none"> <li>• It is still best to practice on the manikin.</li> </ul>                                                                                                       |
| 11 | <ul style="list-style-type: none"> <li>• Interesting. Can try.</li> </ul>                                                                                                                              |
| 12 | <ul style="list-style-type: none"> <li>• More realistic and excited on using VR as part of CPR education.</li> </ul>                                                                                   |
| 13 | <ul style="list-style-type: none"> <li>• Yes. Can be useful as it look real.</li> </ul>                                                                                                                |
| 14 | <ul style="list-style-type: none"> <li>• Simulation as real situation.</li> <li>• Easy visualised.</li> </ul>                                                                                          |
| 15 | <ul style="list-style-type: none"> <li>• Not sure yet.</li> </ul>                                                                                                                                      |
| 16 | <ul style="list-style-type: none"> <li>• It is always good to have new teaching methodology.</li> <li>• The current teaching method has been in place for many many years.</li> </ul>                  |
| 17 | <ul style="list-style-type: none"> <li>• NIL.</li> </ul>                                                                                                                                               |
| 18 | <ul style="list-style-type: none"> <li>• Will be interesting to know how this VR helps in them achieving competency.</li> </ul>                                                                        |
| 19 | <ul style="list-style-type: none"> <li>• VR + “touch” will be useful in CPR education compared to just VR itself.</li> </ul>                                                                           |
| 20 | <ul style="list-style-type: none"> <li>• Pre-programmed scenarios, may or may not need multiple instructor as normal classroom teaching.</li> <li>• Future trend for all sorts of training.</li> </ul> |
| 21 | <ul style="list-style-type: none"> <li>• Tapping into new ideas/technology to enhance learning.</li> </ul>                                                                                             |
| 22 | <ul style="list-style-type: none"> <li>• Can try out.</li> </ul>                                                                                                                                       |
| 23 | <ul style="list-style-type: none"> <li>• It’s new to me. Open to try.</li> </ul>                                                                                                                       |
| 24 | <ul style="list-style-type: none"> <li>• Interesting.</li> </ul>                                                                                                                                       |
| 25 | <ul style="list-style-type: none"> <li>• No idea.</li> </ul>                                                                                                                                           |
| 26 | <ul style="list-style-type: none"> <li>• No previous experience of VR on CPR education.</li> </ul>                                                                                                     |
| 27 | <ul style="list-style-type: none"> <li>• An excellent idea!!</li> </ul>                                                                                                                                |
| 28 | <ul style="list-style-type: none"> <li>• No idea. Will try out.</li> </ul>                                                                                                                             |
| 29 | <ul style="list-style-type: none"> <li>• May simulate real life scenarios.</li> </ul>                                                                                                                  |
| 30 | <ul style="list-style-type: none"> <li>• Not sure yet but sounds interesting.</li> </ul>                                                                                                               |

## Questionnaire B

This questionnaire is to be answered after interacting with the CPR+AED VR Simulation, to find out your thoughts toward its usefulness in CPR education.

### 1. What are your opinions towards using the CPR+AED VR Simulation as part of CPR education?

|   |                                                                                                                                                                                                                                                                                                                                                                                                                                                                                                                                               |
|---|-----------------------------------------------------------------------------------------------------------------------------------------------------------------------------------------------------------------------------------------------------------------------------------------------------------------------------------------------------------------------------------------------------------------------------------------------------------------------------------------------------------------------------------------------|
| 1 | <ul style="list-style-type: none"><li>• Able to refresh step. But limited to steps only.</li><li>• If can have real manikin will be better.</li><li>• Tend not to read the instruction, distracted by the indicator/icon on the body.</li><li>• Encourages independent revision.</li></ul>                                                                                                                                                                                                                                                    |
| 2 | <ul style="list-style-type: none"><li>• It's great idea, as the practitioners can keep on trying on the steps and reflect what has gone wrong.</li><li>• The steps are very focus.</li></ul>                                                                                                                                                                                                                                                                                                                                                  |
| 3 | <ul style="list-style-type: none"><li>• Advantages.<ul style="list-style-type: none"><li>- Very fun, innovative and cool way for young learners.</li><li>- May create interests by using a gaming approach.</li><li>- Good concept.</li></ul></li><li>• Disadvantages.<ul style="list-style-type: none"><li>- May always need a trainer to guide them or can have a simple guide to show learners how to do this.</li><li>- Only focus on steps for memory, lack rationale and concepts behind the sequence of the steps.</li></ul></li></ul> |
| 4 | <ul style="list-style-type: none"><li>• It involves the participant participation.</li><li>• Better visualisation of the practical steps.</li><li>• Clear and precise.</li><li>• Enhance clinical thinking.</li></ul>                                                                                                                                                                                                                                                                                                                         |
| 5 | <ul style="list-style-type: none"><li>• The participant is tested (on VR) on the steps of CPR prior to the test day. An assurance that the participant has actually done the elearning</li><li>• It can be used for CPR training.</li></ul>                                                                                                                                                                                                                                                                                                   |
| 6 | <ul style="list-style-type: none"><li>• Fun way to learn.</li><li>• It will be good if simulation can include skills on hand movements.</li></ul>                                                                                                                                                                                                                                                                                                                                                                                             |
| 7 | <ul style="list-style-type: none"><li>• Good combination via advanced technology to deliver better simulation medical teaching.</li></ul>                                                                                                                                                                                                                                                                                                                                                                                                     |
| 8 | <ul style="list-style-type: none"><li>• It is a interesting and new way of learning.</li><li>• VR makes the learning more reality and involved like a real situations rather than just reading the notes.</li></ul>                                                                                                                                                                                                                                                                                                                           |



|    |                                                                                                                                                                                                                                                                                                                  |
|----|------------------------------------------------------------------------------------------------------------------------------------------------------------------------------------------------------------------------------------------------------------------------------------------------------------------|
| 9  | <ul style="list-style-type: none"> <li>• It is creative teaching strategies and attract the students and public.</li> </ul>                                                                                                                                                                                      |
| 10 | <ul style="list-style-type: none"> <li>• It is more fun for participants.</li> <li>• More realistic as participants can visualise themselves in a familiar surrounding rather than classroom.</li> </ul>                                                                                                         |
| 11 | <ul style="list-style-type: none"> <li>• Fun and interesting way of learning.</li> </ul>                                                                                                                                                                                                                         |
| 12 | <ul style="list-style-type: none"> <li>• Able to be in the “real” environment to rescue the victims without a need to visualise or imagine the real environment.</li> </ul>                                                                                                                                      |
| 13 | <ul style="list-style-type: none"> <li>• Good visual effects.</li> <li>• However, some questions not very cleared.</li> <li>• ? suitable for people with spectacles.</li> </ul>                                                                                                                                  |
| 14 | <ul style="list-style-type: none"> <li>• Good for pre-course education and self learning.</li> <li>• Save time.</li> </ul>                                                                                                                                                                                       |
| 15 | <ul style="list-style-type: none"> <li>• Possible. But need to explore.</li> <li>• But limitations unable to assess skills.</li> </ul>                                                                                                                                                                           |
| 16 | <ul style="list-style-type: none"> <li>• Good and interactive.</li> <li>• But would be better if can have touch the “victim”.</li> </ul>                                                                                                                                                                         |
| 17 | <ul style="list-style-type: none"> <li>• Not “close” to victim, given the impression of “unreal”.</li> <li>• Image is pretty clear.</li> <li>• May be good for tutorial but not for skills assessment.</li> <li>• Can’t simulate breathing.</li> </ul>                                                           |
| 18 | <ul style="list-style-type: none"> <li>• It will be useful for knowledge assessment.</li> </ul>                                                                                                                                                                                                                  |
| 19 | <ul style="list-style-type: none"> <li>• Feels giddy + heavy goggle.</li> <li>• No clear instruction to move head from left to right – to check for danger in the VR game.</li> </ul>                                                                                                                            |
| 20 | <ul style="list-style-type: none"> <li>• Fun to learn.</li> <li>• Provide a real life situation rather than only teach using mannequin and verbalised the scenario.</li> <li>• Can attract different group of audience id use in exhibition who do not have interest to go to classroom to learn CPR.</li> </ul> |
| 21 | <ul style="list-style-type: none"> <li>• The simulation is interesting to mimic a real situation.</li> <li>• Makes learning fun = better understanding/willing students.</li> </ul>                                                                                                                              |
| 22 | <ul style="list-style-type: none"> <li>• Maybe younger folks would prefer.</li> <li>• Should not stop when mistakes happen and allow learner to continue other step but make known what was the mistake.</li> </ul>                                                                                              |
| 23 | <ul style="list-style-type: none"> <li>• Looks real.</li> <li>• Will be better if have sound when counting.</li> </ul>                                                                                                                                                                                           |

|    |                                                                                                                                                                                                              |
|----|--------------------------------------------------------------------------------------------------------------------------------------------------------------------------------------------------------------|
|    | <ul style="list-style-type: none"> <li>• It's difficult to read the steps and look at the patient at the same time.</li> </ul>                                                                               |
| 24 | <ul style="list-style-type: none"> <li>• More interesting than reading a manual to remember sequence.</li> </ul>                                                                                             |
| 25 | <ul style="list-style-type: none"> <li>• Need more real life scenario.</li> <li>• Need to do the CPR techniques rather than via the remote to check on steps.</li> </ul>                                     |
| 26 | <ul style="list-style-type: none"> <li>• Has potential but lacks real hands-on for trainee.</li> <li>• However, better than pure didactic lecture (more interactive).</li> </ul>                             |
| 27 | <ul style="list-style-type: none"> <li>• Extremely positive!</li> <li>• An ideal option for teaching "routine"/"standardised" protocols – because steps can be programmed and checked off a list.</li> </ul> |
| 28 | <ul style="list-style-type: none"> <li>• Head set is very heavy.</li> <li>• Don't know where to direct laser jet to.</li> </ul>                                                                              |
| 29 | <ul style="list-style-type: none"> <li>• Interesting concept.</li> <li>• May serve to engage students more.</li> </ul>                                                                                       |
| 30 | <ul style="list-style-type: none"> <li>• Good, definitely an advantage.</li> <li>• May be fun for younger generation.</li> </ul>                                                                             |

## 2. What role can the CPR+AED VR Simulation play in CPR education?

|   |                                                                                                                                                                                                                                                           |
|---|-----------------------------------------------------------------------------------------------------------------------------------------------------------------------------------------------------------------------------------------------------------|
| 1 | <ul style="list-style-type: none"> <li>• Cannot be use by itself without practical experiences.</li> <li>• Can be useful for practice before refresher course.</li> <li>• Alternative revision without presence of instructor/bulky equipment.</li> </ul> |
| 2 | <ul style="list-style-type: none"> <li>• Serve as a summary after E-learn.</li> <li>• Refreshment within 2 year.</li> <li>• Resources.</li> </ul>                                                                                                         |
| 3 | <ul style="list-style-type: none"> <li>• Nurse can physically try it during their free time.</li> <li>• May entice learners to try before they come for class.</li> </ul>                                                                                 |
| 4 | <ul style="list-style-type: none"> <li>• Enhance staff participation and knowledge.</li> <li>• Quick revision of steps.</li> <li>• Useful for both pre-course and post-course.</li> </ul>                                                                 |
| 5 | <ul style="list-style-type: none"> <li>• Provide an aid to elearning for both refresher and newbies.</li> </ul>                                                                                                                                           |
| 6 | <ul style="list-style-type: none"> <li>• Can put together with e-learning for both new and recert.</li> </ul>                                                                                                                                             |

|    |                                                                                                                                                                                                                                      |
|----|--------------------------------------------------------------------------------------------------------------------------------------------------------------------------------------------------------------------------------------|
|    | <ul style="list-style-type: none"> <li>• Can replace the videos on e-learning.</li> </ul>                                                                                                                                            |
| 7  | <ul style="list-style-type: none"> <li>• Good and useful for refresher course.</li> </ul>                                                                                                                                            |
| 8  | <ul style="list-style-type: none"> <li>• Guide the learner in a more reality way of learning.</li> <li>• It is useful for new learner especially, they can get more clearer picture how does CPR AED was done.</li> </ul>            |
| 9  | <ul style="list-style-type: none"> <li>• Prior the test.</li> <li>• Large cohort of participants.</li> </ul>                                                                                                                         |
| 10 | <ul style="list-style-type: none"> <li>• Just for practice maybe at home before coming for the real practical.</li> </ul>                                                                                                            |
| 11 | <ul style="list-style-type: none"> <li>• Can help to familiar with steps first before practical. Can practice the steps several times.</li> <li>• Useful for both new learners and refreshers.</li> </ul>                            |
| 12 | <ul style="list-style-type: none"> <li>• Can be useful to revise the steps of CPR in the “real” environment, for new staff or recert (preknowledge is good).</li> </ul>                                                              |
| 13 | <ul style="list-style-type: none"> <li>• Visual effects.</li> <li>• To practice before actual test.</li> <li>• Can be used in both new trainee or refresher.</li> </ul>                                                              |
| 14 | <ul style="list-style-type: none"> <li>• Suitable for self study.</li> <li>• Learning pre-course/post-course at own pace.</li> </ul>                                                                                                 |
| 15 | <ul style="list-style-type: none"> <li>• Not for assessment of skills but for steps and knowledge ok.</li> </ul>                                                                                                                     |
| 16 | <ul style="list-style-type: none"> <li>• Add on to elearning.</li> </ul>                                                                                                                                                             |
| 17 | <ul style="list-style-type: none"> <li>• Tutorial prior to skills assessment.</li> </ul>                                                                                                                                             |
| 18 | <ul style="list-style-type: none"> <li>• Together with elearning.</li> <li>• Provide more visual attraction and draws learner attention and perhaps will increase their motivation to learn.</li> </ul>                              |
| 19 | <ul style="list-style-type: none"> <li>• It is innovative but no practical “hands on” simulation.</li> </ul>                                                                                                                         |
| 20 | <ul style="list-style-type: none"> <li>• Good as pre-course material for people who do not have previous certification on CPR.</li> </ul>                                                                                            |
| 21 | <ul style="list-style-type: none"> <li>• It can help the new learners to remember the CPR steps easily by simulating a real life scenario.</li> </ul>                                                                                |
| 22 | <ul style="list-style-type: none"> <li>• In between 2 years as a refresher because time is a bit too long for 2 years and if learner can have own refresher via VR, it may help.</li> </ul>                                          |
| 23 | <ul style="list-style-type: none"> <li>• May be good for training the new student/no experience public.</li> <li>• Pre-course material.</li> <li>• Good for visualisation.</li> </ul>                                                |
| 24 | <ul style="list-style-type: none"> <li>• Probably better for new staff who may need to visualise the instructions and steps.</li> <li>• Can work together with elearning video in aiding the staff to remember CPR steps.</li> </ul> |

|    |                                                                                                                                                                                                                                                                                           |
|----|-------------------------------------------------------------------------------------------------------------------------------------------------------------------------------------------------------------------------------------------------------------------------------------------|
| 25 | <ul style="list-style-type: none"> <li>• Currently teaching and tests the steps on CPR.</li> <li>• Currently there are education methods and videos – good enough.</li> <li>• If need VR simulation, will be useful if can check on techniques.</li> </ul>                                |
| 26 | <ul style="list-style-type: none"> <li>• More suitable for re-certification (1-2 yearly recertification).</li> <li>• For 1<sup>st</sup> time trainees, still better for hands-on practice.</li> </ul>                                                                                     |
| 27 | <ul style="list-style-type: none"> <li>• Step checklist.</li> <li>• And instant feedback.</li> <li>• Mass teaching.</li> </ul>                                                                                                                                                            |
| 28 | <ul style="list-style-type: none"> <li>• Very artificial scenario with cartoons. Not real.</li> </ul>                                                                                                                                                                                     |
| 29 | <ul style="list-style-type: none"> <li>• Emphasize the importance of getting the sequence correct.</li> <li>• Reduce the requirement of manpower for tutors.</li> <li>• Useful for 1<sup>st</sup> timers and refreshers but may be more interesting for 1<sup>st</sup> timers.</li> </ul> |
| 30 | <ul style="list-style-type: none"> <li>• More realism.</li> <li>• New staff – virtual + hands on.</li> <li>• Refresher – virtual good enough, main problem steps rather than technique.</li> </ul>                                                                                        |

### 3. Any other comments?

|   |                                                                                                                                                                                                                                                                                 |
|---|---------------------------------------------------------------------------------------------------------------------------------------------------------------------------------------------------------------------------------------------------------------------------------|
| 1 | <ul style="list-style-type: none"> <li>• Step 3 should be more detail to explain the rationale behind if for new testee.</li> </ul>                                                                                                                                             |
| 2 | <ul style="list-style-type: none"> <li>• To make the technology more user-friendly.</li> <li>• Add in others like infant, adult choking.</li> </ul>                                                                                                                             |
| 3 | <ul style="list-style-type: none"> <li>• 1 and 2 and 2 and 4 and 5 and 6... needs to align with what we are teaching currently.</li> <li>• To include voice over on rationale, rather than just testing the steps as we do not want learners to memorise steps only.</li> </ul> |
| 4 | <ul style="list-style-type: none"> <li>• NIL.</li> </ul>                                                                                                                                                                                                                        |
| 5 | <ul style="list-style-type: none"> <li>• VR to allow participants to have hands-on would be very ideal (CPR very skills based).</li> </ul>                                                                                                                                      |
| 6 | <ul style="list-style-type: none"> <li>• Not really ideal for practical skills.</li> </ul>                                                                                                                                                                                      |
| 7 | <ul style="list-style-type: none"> <li>• NIL.</li> </ul>                                                                                                                                                                                                                        |
| 8 | <ul style="list-style-type: none"> <li>• NIL.</li> </ul>                                                                                                                                                                                                                        |
| 9 | <ul style="list-style-type: none"> <li>• Head set is a bit too heavy.</li> <li>• Need to have more clear and specific instructions.</li> </ul>                                                                                                                                  |

|    |                                                                                                                                                                                                                           |
|----|---------------------------------------------------------------------------------------------------------------------------------------------------------------------------------------------------------------------------|
|    | <ul style="list-style-type: none"> <li>• Instruction font size could be bigger.</li> </ul>                                                                                                                                |
| 10 | <ul style="list-style-type: none"> <li>• NIL.</li> </ul>                                                                                                                                                                  |
| 11 | <ul style="list-style-type: none"> <li>• More sensitive pointer.</li> </ul>                                                                                                                                               |
| 12 | <ul style="list-style-type: none"> <li>• The VR headset can be lighter.</li> <li>• Propose to improve VR simulation play to explore to hands on practice teaching.</li> </ul>                                             |
| 13 | <ul style="list-style-type: none"> <li>• NIL.</li> </ul>                                                                                                                                                                  |
| 14 | <ul style="list-style-type: none"> <li>• Need a good eyesight to read the instruction.</li> <li>• Not easy to select options.</li> </ul>                                                                                  |
| 15 | <ul style="list-style-type: none"> <li>• Need to explore further. Feel very “artificial”.</li> </ul>                                                                                                                      |
| 16 | <ul style="list-style-type: none"> <li>• Keep it up.</li> </ul>                                                                                                                                                           |
| 17 | <ul style="list-style-type: none"> <li>• NIL.</li> </ul>                                                                                                                                                                  |
| 18 | <ul style="list-style-type: none"> <li>• VR equipment is kind of heavy.</li> </ul>                                                                                                                                        |
| 19 | <ul style="list-style-type: none"> <li>• Prefers hand-on practice. Realistic environment but not hands-on.</li> </ul>                                                                                                     |
| 20 | <ul style="list-style-type: none"> <li>• Interest members of public who otherwise are not interested to go for CPR training.</li> </ul>                                                                                   |
| 21 | <ul style="list-style-type: none"> <li>• Would help with making it easy to remembers (theory).</li> <li>• Still would require staff to do practical test.</li> </ul>                                                      |
| 22 | <ul style="list-style-type: none"> <li>• NIL.</li> </ul>                                                                                                                                                                  |
| 23 | <ul style="list-style-type: none"> <li>• Maybe can put in like animation with interaction.</li> </ul>                                                                                                                     |
| 24 | <ul style="list-style-type: none"> <li>• No.</li> </ul>                                                                                                                                                                   |
| 25 | <ul style="list-style-type: none"> <li>• NIL.</li> </ul>                                                                                                                                                                  |
| 26 | <ul style="list-style-type: none"> <li>• I am curious about the cost of VR technology.</li> <li>• Patient should not be “killed off” with just one omission/error (allow prompting of trainee where possible).</li> </ul> |
| 27 | <ul style="list-style-type: none"> <li>• An excellent idea and hopefully will be widely implemented.</li> </ul>                                                                                                           |
| 28 | <ul style="list-style-type: none"> <li>• Mannequin teaching more realistic.</li> </ul>                                                                                                                                    |
| 29 | <ul style="list-style-type: none"> <li>• Can consider incorporating this into training definitely.</li> </ul>                                                                                                             |
| 30 | <ul style="list-style-type: none"> <li>• Resolution.</li> <li>• Content needs finetuning.</li> <li>• Benefit – learning sequence.</li> <li>• Disadvantage – no practicum of CPR.</li> </ul>                               |

- |  |                                                                                                                 |
|--|-----------------------------------------------------------------------------------------------------------------|
|  | <ul style="list-style-type: none"><li>• Graphics should be more real rather than computerised images.</li></ul> |
|--|-----------------------------------------------------------------------------------------------------------------|

**Thank you for your participation.**
